# Supplementary material for: The impact of SARS-CoV-2 vaccines on antibody responses in the general population in the United Kingdom
Source: bioRxiv or medRxiv preprint supplement (doi:10.1101/2021.04.22.21255911), 2021-04-23
Supplement: Supplementary file [file media-1.pdf]

# The impact of SARS-CoV-2 vaccines on antibody responses in the general population in the United Kingdom: Supplementary material

## Supplementary tables

|                                                    | No evidence of prior infection |                          |                         | Evidence of prior infection |                         |                    | p value |
|----------------------------------------------------|--------------------------------|--------------------------|-------------------------|-----------------------------|-------------------------|--------------------|---------|
|                                                    | One dose AZ<br>(N=23368)       | One dose Pf<br>(N=14894) | Two doses<br>Pf(N=1869) | One dose AZ<br>(N=3767)     | One dose Pf<br>(N=2067) | Total<br>(N=45965) |         |
| <b>Duration between two doses [Median (IQR)]</b>   | 31 (21-47)                     |                          |                         |                             |                         |                    |         |
| <b>Age</b>                                         |                                |                          |                         |                             |                         |                    | < 0.001 |
| <b>Median</b>                                      | 63                             | 66                       | 70                      | 61                          | 62                      | 64                 |         |
| <b>IQR</b>                                         | 55, 70                         | 54, 73                   | 53, 80                  | 52, 68                      | 50, 70                  | 54, 71             |         |
| <b>Sex</b>                                         |                                |                          |                         |                             |                         |                    | < 0.001 |
| <b>Female</b>                                      | 12510 (53.5%)                  | 8497 (57.0%)             | 1153 (61.7%)            | 2034 (54.0%)                | 1136 (55.0%)            | 25330 (55.1%)      |         |
| <b>Male</b>                                        | 10858 (46.5%)                  | 6397 (43.0%)             | 716 (38.3%)             | 1733 (46.0%)                | 931 (45.0%)             | 20635 (44.9%)      |         |
| <b>Ethnicity</b>                                   |                                |                          |                         |                             |                         |                    | < 0.001 |
| <b>Non-white</b>                                   | 1110 (4.8%)                    | 817 (5.5%)               | 118 (6.3%)              | 241 (6.4%)                  | 148 (7.2%)              | 2434 (5.3%)        |         |
| <b>White</b>                                       | 22258 (95.2%)                  | 14077 (94.5%)            | 1751 (93.7%)            | 3526 (93.6%)                | 1919 (92.8%)            | 43531 (94.7%)      |         |
| <b>Household size</b>                              |                                |                          |                         |                             |                         |                    | < 0.001 |
| <b>1</b>                                           | 5019 (21.5%)                   | 3302 (22.2%)             | 501 (26.8%)             | 721 (19.1%)                 | 395 (19.1%)             | 9938 (21.6%)       |         |
| <b>2</b>                                           | 12990 (55.6%)                  | 8260 (55.5%)             | 985 (52.7%)             | 1916 (50.9%)                | 1072 (51.9%)            | 25223 (54.9%)      |         |
| <b>3</b>                                           | 2863 (12.3%)                   | 1688 (11.3%)             | 168 (9.0%)              | 545 (14.5%)                 | 312 (15.1%)             | 5576 (12.1%)       |         |
| <b>4</b>                                           | 1797 (7.7%)                    | 1130 (7.6%)              | 145 (7.8%)              | 403 (10.7%)                 | 202 (9.8%)              | 3677 (8.0%)        |         |
| <b>5+</b>                                          | 699 (3.0%)                     | 514 (3.5%)               | 70 (3.7%)               | 182 (4.8%)                  | 86 (4.2%)               | 1551 (3.4%)        |         |
| <b>Deprivation percentile</b>                      |                                |                          |                         |                             |                         |                    | < 0.001 |
| <b>Median</b>                                      | 63                             | 64                       | 64                      | 60                          | 57                      | 63                 |         |
| <b>IQR</b>                                         | 40, 82                         | 40, 83                   | 38, 83                  | 35, 81                      | 32, 79                  | 39, 82             |         |
| <b>Report working in patient facing healthcare</b> |                                |                          |                         |                             |                         |                    | < 0.001 |
| <b>No</b>                                          | 22860 (97.8%)                  | 13430 (90.2%)            | 1466 (78.4%)            | 3636 (96.5%)                | 1828 (88.4%)            | 43220 (94.0%)      |         |
| <b>Yes</b>                                         | 508 (2.2%)                     | 1464 (9.8%)              | 403 (21.6%)             | 131 (3.5%)                  | 239 (11.6%)             | 2745 (6.0%)        |         |
| <b>Report working in person facing social care</b> |                                |                          |                         |                             |                         |                    | < 0.001 |
| <b>No</b>                                          | 23149 (99.1%)                  | 14548 (97.7%)            | 1800 (96.3%)            | 3717 (98.7%)                | 2014 (97.4%)            | 45228 (98.4%)      |         |
| <b>Yes</b>                                         | 219 (0.9%)                     | 346 (2.3%)               | 69 (3.7%)               | 50 (1.3%)                   | 53 (2.6%)               | 737 (1.6%)         |         |
| <b>Report working in a care home (any role)</b>    |                                |                          |                         |                             |                         |                    | < 0.001 |
| <b>No</b>                                          | 23195 (99.3%)                  | 14551 (97.7%)            | 1778 (95.1%)            | 3701 (98.2%)                | 2011 (97.3%)            | 45236 (98.4%)      |         |
| <b>Yes</b>                                         | 173 (0.7%)                     | 343 (2.3%)               | 91 (4.9%)               | 66 (1.8%)                   | 56 (2.7%)               | 729 (1.6%)         |         |
| <b>Report having long-term health condition</b>    |                                |                          |                         |                             |                         |                    | < 0.001 |
| <b>No</b>                                          | 15774 (67.5%)                  | 9597 (64.4%)             | 1217 (65.1%)            | 2645 (70.2%)                | 1398 (67.6%)            | 30631 (66.6%)      |         |
| <b>Yes</b>                                         | 7594 (32.5%)                   | 5297 (35.6%)             | 652 (34.9%)             | 1122 (29.8%)                | 669 (32.4%)             | 15334 (33.4%)      |         |

**Table S1. Participants' characteristics by cohort.** AZ: Oxford-AstraZeneca vaccine. Pf: Pfizer-BioNTech vaccine. Note: higher deprivation percentile means living in a less deprived area.

| Time (days)           | Age | No prior infection                                         |                 |                  | Prior infection |                 |
|-----------------------|-----|------------------------------------------------------------|-----------------|------------------|-----------------|-----------------|
|                       |     | AZ one dose                                                | Pfizer one dose | Pfizer two doses | AZ one dose     | Pfizer one dose |
| <b>Logistic model</b> |     | Predicted probability of anti-spike IgG positivity (95%CI) |                 |                  |                 |                 |
| 0                     | 20  | 1 (0-3)                                                    | 0 (0-1)         | 5 (1-16)         | 90 (82-95)      | 94 (88-97)      |
| 0                     | 40  | 1 (0-1)                                                    | 0 (0-1)         | 2 (1-5)          | 85 (80-88)      | 89 (84-92)      |
| 0                     | 60  | 0 (0-0)                                                    | 0 (0-0)         | 1 (1-2)          | 78 (75-82)      | 81 (77-84)      |
| 0                     | 80  | 0 (0-0)                                                    | 0 (0-0)         | 0 (0-1)          | 70 (61-78)      | 69 (59-77)      |
| 7                     | 20  | 9 (4-20)                                                   | 29 (17-45)      | 60 (34-81)       | 91 (83-96)      | 97 (94-99)      |
| 7                     | 40  | 6 (4-10)                                                   | 13 (9-18)       | 36 (23-52)       | 88 (83-91)      | 94 (90-96)      |
| 7                     | 60  | 5 (4-6)                                                    | 6 (4-8)         | 18 (12-25)       | 82 (78-85)      | 87 (83-90)      |
| 7                     | 80  | 2 (1-4)                                                    | 3 (2-5)         | 8 (4-14)         | 74 (66-81)      | 73 (64-81)      |
| 14                    | 20  | 79 (62-90)                                                 | 97 (92-99)      | 95 (87-98)       | 93 (86-97)      | 99 (97-100)     |
| 14                    | 40  | 63 (55-71)                                                 | 95 (92-97)      | 89 (80-94)       | 92 (89-94)      | 97 (95-99)      |
| 14                    | 60  | 49 (44-53)                                                 | 89 (86-91)      | 78 (70-83)       | 89 (87-92)      | 95 (93-96)      |
| 14                    | 80  | 20 (14-28)                                                 | 66 (59-72)      | 60 (49-70)       | 83 (76-88)      | 90 (84-93)      |
| 21                    | 20  | 90 (77-96)                                                 | 98 (94-99)      | 98 (93-99)       | 96 (89-98)      | 99 (97-100)     |
| 21                    | 40  | 85 (78-90)                                                 | 96 (94-98)      | 96 (91-98)       | 95 (92-97)      | 99 (97-99)      |
| 21                    | 60  | 81 (77-84)                                                 | 93 (91-95)      | 91 (87-94)       | 95 (93-96)      | 98 (97-98)      |
| 21                    | 80  | 60 (52-68)                                                 | 81 (75-85)      | 84 (77-89)       | 90 (85-93)      | 96 (93-98)      |
| 28                    | 20  | 90 (74-96)                                                 | 97 (93-99)      | 97 (89-99)       | 97 (92-99)      | 99 (97-100)     |
| 28                    | 40  | 84 (76-89)                                                 | 95 (92-97)      | 95 (90-98)       | 97 (94-98)      | 99 (98-100)     |
| 28                    | 60  | 79 (75-83)                                                 | 91 (89-93)      | 93 (89-95)       | 96 (95-97)      | 98 (97-99)      |
| 28                    | 80  | 74 (66-80)                                                 | 85 (80-89)      | 89 (84-93)       | 94 (90-96)      | 98 (95-99)      |
| 35                    | 20  | 94 (79-99)                                                 | 98 (95-99)      | 93 (83-98)       | 99 (93-100)     | 99 (97-100)     |
| 35                    | 40  | 86 (78-91)                                                 | 96 (93-97)      | 94 (88-97)       | 98 (95-99)      | 99 (98-100)     |
| 35                    | 60  | 80 (75-84)                                                 | 91 (89-93)      | 94 (91-96)       | 97 (96-98)      | 98 (97-99)      |
| 35                    | 80  | 74 (67-80)                                                 | 81 (76-85)      | 94 (90-97)       | 95 (92-97)      | 97 (95-99)      |
| 42                    | 20  | 92 (72-98)                                                 | 98 (94-99)      | 95 (86-98)       | 99 (93-100)     | 100 (98-100)    |
| 42                    | 40  | 84 (75-90)                                                 | 96 (93-97)      | 94 (88-97)       | 99 (95-100)     | 99 (98-100)     |
| 42                    | 60  | 79 (73-84)                                                 | 91 (88-93)      | 93 (89-95)       | 97 (95-99)      | 98 (97-99)      |
| 42                    | 80  | 75 (67-81)                                                 | 82 (77-86)      | 91 (85-95)       | 96 (91-98)      | 96 (93-98)      |
| 49                    | 20  | 80 (39-96)                                                 | 98 (94-99)      | 95 (87-98)       | -               | 100 (98-100)    |
| 49                    | 40  | 84 (71-92)                                                 | 95 (92-97)      | 94 (89-97)       | -               | 100 (97-100)    |
| 49                    | 60  | 78 (67-86)                                                 | 89 (85-92)      | 93 (89-95)       | -               | 98 (96-99)      |
| 49                    | 80  | 78 (67-86)                                                 | 79 (74-84)      | 91 (85-94)       | -               | 92 (86-96)      |
| <b>Linear model</b>   |     | Predicted anti-spike IgG levels in mAb units (95%CI)       |                 |                  |                 |                 |
| 0                     | 20  | 7 (5-9)                                                    | 4 (3-6)         | 5 (3-8)          | 123 (82-185)    | 139 (90-216)    |
| 0                     | 40  | 6 (5-7)                                                    | 5 (5-6)         | 5 (4-7)          | 96 (78-119)     | 126 (102-156)   |
| 0                     | 60  | 5 (5-6)                                                    | 5 (4-5)         | 6 (5-7)          | 94 (81-108)     | 98 (83-115)     |
| 0                     | 80  | 4 (4-5)                                                    | 5 (4-5)         | 5 (4-6)          | 69 (53-90)      | 71 (55-92)      |
| 7                     | 20  | 9 (7-12)                                                   | 14 (11-18)      | 30 (17-52)       | 167 (111-251)   | 220 (141-342)   |
| 7                     | 40  | 7 (7-8)                                                    | 10 (9-11)       | 17 (13-22)       | 169 (136-210)   | 202 (162-250)   |
| 7                     | 60  | 6 (6-6)                                                    | 7 (7-8)         | 10 (8-12)        | 152 (132-176)   | 138 (117-163)   |
| 7                     | 80  | 5 (4-5)                                                    | 5 (5-5)         | 6 (5-8)          | 88 (67-117)     | 85 (66-108)     |

|           |    |               |               |               |                |               |
|-----------|----|---------------|---------------|---------------|----------------|---------------|
| <b>14</b> | 20 | 90 (71-115)   | 293 (228-375) | 182 (110-301) | 242 (155-376)  | 307 (204-464) |
| <b>14</b> | 40 | 50 (45-56)    | 201 (181-225) | 151 (117-196) | 306 (243-386)  | 301 (244-371) |
| <b>14</b> | 60 | 38 (36-40)    | 127 (119-137) | 105 (86-128)  | 248 (214-287)  | 254 (217-298) |
| <b>14</b> | 80 | 16 (15-19)    | 61 (56-67)    | 48 (39-58)    | 126 (96-166)   | 143 (113-181) |
| <b>21</b> | 20 | 197 (152-257) | 325 (258-409) | 287 (173-478) | 318 (197-514)  | 363 (243-542) |
| <b>21</b> | 40 | 113 (100-127) | 250 (225-277) | 219 (171-280) | 381 (299-485)  | 398 (324-489) |
| <b>21</b> | 60 | 91 (85-97)    | 173 (162-185) | 166 (136-202) | 312 (267-365)  | 361 (307-424) |
| <b>21</b> | 80 | 52 (47-58)    | 101 (93-110)  | 123 (103-147) | 182 (141-236)  | 223 (174-286) |
| <b>28</b> | 20 | 127 (94-171)  | 334 (266-420) | 259 (153-440) | 389 (237-639)  | 380 (245-591) |
| <b>28</b> | 40 | 113 (99-129)  | 236 (214-261) | 232 (179-301) | 369 (286-477)  | 402 (324-497) |
| <b>28</b> | 60 | 94 (87-100)   | 163 (153-175) | 192 (158-232) | 347 (291-413)  | 385 (328-452) |
| <b>28</b> | 80 | 73 (65-81)    | 113 (104-123) | 163 (136-196) | 224 (173-290)  | 281 (221-356) |
| <b>35</b> | 20 | 192 (135-274) | 359 (278-464) | 250 (157-400) | 485 (274-860)  | 401 (250-644) |
| <b>35</b> | 40 | 125 (108-144) | 216 (193-242) | 196 (157-246) | 356 (267-476)  | 404 (321-508) |
| <b>35</b> | 60 | 92 (85-100)   | 159 (148-171) | 160 (133-193) | 345 (283-420)  | 361 (305-429) |
| <b>35</b> | 80 | 71 (64-79)    | 108 (99-117)  | 212 (180-251) | 218 (165-288)  | 295 (234-372) |
| <b>42</b> | 20 | 188 (123-288) | 287 (221-373) | 344 (215-551) | 622 (251-1542) | 424 (262-685) |
| <b>42</b> | 40 | 93 (80-109)   | 202 (178-229) | 244 (192-310) | 412 (273-621)  | 411 (320-527) |
| <b>42</b> | 60 | 86 (78-95)    | 146 (134-159) | 191 (159-229) | 335 (259-433)  | 353 (292-426) |
| <b>42</b> | 80 | 74 (66-83)    | 94 (86-104)   | 175 (145-211) | 200 (146-275)  | 280 (222-353) |
| <b>49</b> | 20 | 107 (59-196)  | 269 (206-351) | 382 (241-608) | -              | 450 (260-777) |
| <b>49</b> | 40 | 108 (85-139)  | 177 (155-202) | 264 (210-332) | -              | 441 (336-579) |
| <b>49</b> | 60 | 79 (66-94)    | 117 (106-129) | 218 (181-263) | -              | 385 (312-475) |
| <b>49</b> | 80 | 73 (62-87)    | 81 (74-89)    | 220 (184-262) | -              | 273 (212-351) |

**Table S2. Predicted probability of anti-spike IgG seropositivity and anti-spike IgG levels (in mAb units) with 95% confidence interval (CI) according to age, vaccine type and dose, and prior infection status by weeks after vaccination. AZ: Oxford-AstraZeneca vaccine. Pf: Pfizer-BioNTech vaccine.**

|                                                    | Oxford-AstraZeneca |                     |                      |                     |         | Pfizer-BioNTech    |                     |                     |                    |         |
|----------------------------------------------------|--------------------|---------------------|----------------------|---------------------|---------|--------------------|---------------------|---------------------|--------------------|---------|
|                                                    | Class 1<br>(N=867) | Class 2<br>(N=7097) | Class 3<br>(N=13163) | Class 4<br>(N=1297) | p value | Class 1<br>(N=547) | Class 2<br>(N=8951) | Class 3<br>(N=3876) | Class 4<br>(N=720) | p value |
| <b>Percentage</b>                                  | 3.9%               | 31.6%               | 58.7%                | 5.8%                |         | 3.9%               | 63.5%               | 27.5%               | 5.1%               |         |
| <b>Age</b>                                         |                    |                     |                      |                     | < 0.001 |                    |                     |                     |                    | < 0.001 |
| <b>Median</b>                                      | 58                 | 60                  | 64                   | 68                  |         | 64                 | 62                  | 72                  | 71                 |         |
| <b>IQR</b>                                         | 50, 66             | 48, 68              | 57, 70               | 60, 73              |         | 50, 73             | 49, 70              | 66, 77              | 62, 78             |         |
| <b>Age group</b>                                   |                    |                     |                      |                     | < 0.001 |                    |                     |                     |                    | < 0.001 |
| <b>16-34</b>                                       | 73 (8.4%)          | 709 (10.0%)         | 167 (1.3%)           | 22 (1.7%)           |         | 63 (11.5%)         | 760 (8.5%)          | 12 (0.3%)           | 26 (3.6%)          |         |
| <b>35-54</b>                                       | 274 (31.6%)        | 1863 (26.3%)        | 2412 (18.3%)         | 165 (12.7%)         |         | 119 (21.8%)        | 2240 (25.0%)        | 231 (6.0%)          | 76 (10.6%)         |         |
| <b>55-74</b>                                       | 461 (53.2%)        | 4119 (58.0%)        | 9185 (69.8%)         | 862 (66.5%)         |         | 250 (45.7%)        | 4863 (54.3%)        | 2209 (57.0%)        | 354 (49.2%)        |         |
| <b>&gt;75</b>                                      | 59 (6.8%)          | 406 (5.7%)          | 1399 (10.6%)         | 248 (19.1%)         |         | 115 (21.0%)        | 1088 (12.2%)        | 1424 (36.7%)        | 264 (36.7%)        |         |
| <b>Sex</b>                                         |                    |                     |                      |                     | < 0.001 |                    |                     |                     |                    | < 0.001 |
| <b>Female</b>                                      | 453 (52.2%)        | 4467 (62.9%)        | 6505 (49.4%)         | 600 (46.3%)         |         | 305 (55.8%)        | 5577 (62.3%)        | 1721 (44.4%)        | 364 (50.6%)        |         |
| <b>Male</b>                                        | 414 (47.8%)        | 2630 (37.1%)        | 6658 (50.6%)         | 697 (53.7%)         |         | 242 (44.2%)        | 3374 (37.7%)        | 2155 (55.6%)        | 356 (49.4%)        |         |
| <b>Report working in patient facing healthcare</b> |                    |                     |                      |                     | < 0.001 |                    |                     |                     |                    | < 0.001 |
| <b>No</b>                                          | 834 (96.2%)        | 6902 (97.3%)        | 12966 (98.5%)        | 1276 (98.4%)        |         | 475 (86.8%)        | 7976 (89.1%)        | 3791 (97.8%)        | 692 (96.1%)        |         |
| <b>Yes</b>                                         | 33 (3.8%)          | 195 (2.7%)          | 197 (1.5%)           | 21 (1.6%)           |         | 72 (13.2%)         | 975 (10.9%)         | 85 (2.2%)           | 28 (3.9%)          |         |
| <b>Report having long-term health condition</b>    |                    |                     |                      |                     | < 0.001 |                    |                     |                     |                    | < 0.001 |
| <b>No</b>                                          | 592 (68.3%)        | 5104 (71.9%)        | 8859 (67.3%)         | 636 (49.0%)         |         | 355 (64.9%)        | 6219 (69.5%)        | 2096 (54.1%)        | 344 (47.8%)        |         |
| <b>Yes</b>                                         | 275 (31.7%)        | 1993 (28.1%)        | 4304 (32.7%)         | 661 (51.0%)         |         | 192 (35.1%)        | 2732 (30.5%)        | 1780 (45.9%)        | 376 (52.2%)        |         |
| <b>Membership probability (%)</b>                  |                    |                     |                      |                     | < 0.001 |                    |                     |                     |                    | < 0.001 |
| <b>Median</b>                                      | 98                 | 82                  | 71                   | 99                  |         | 94                 | 89                  | 86                  | 100                |         |
| <b>IQR</b>                                         | 78, 100            | 61, 97              | 54, 92               | 84, 100             |         | 75, 100            | 74, 98              | 64, 97              | 91, 100            |         |

**Table S3. Characteristics of classes identified from latent class mixed models for single dose Oxford-AstraZeneca and Pfizer-BioNTech vaccines in those without evidence of prior infection. Class 1='plausibly previously infected' group, 2='high response' group, 3='medium response' group, 4='low response group'.**

Supplementary figures

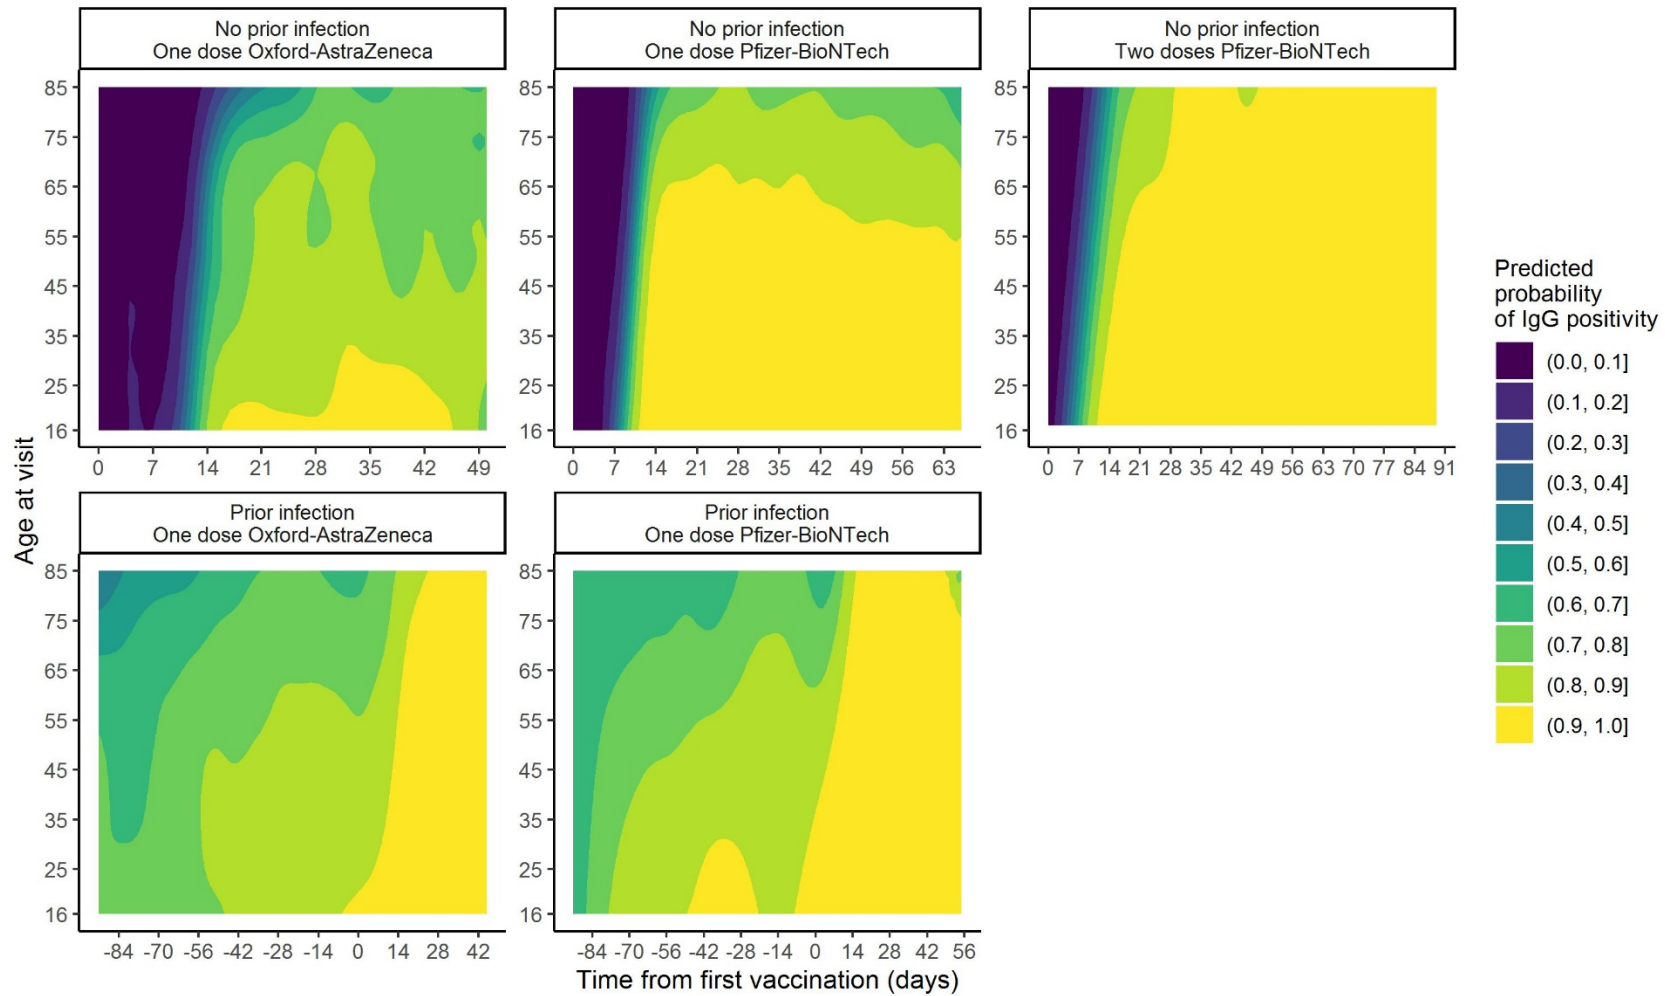

**Figure S1. Predicted probability of anti-spike IgG positivity by time from first vaccination and age, according to vaccine type and prior infection status (full model).** Predictions shown for specific ages in **Figure 1**. Observed data in **Supplementary Figures S3-S7**.

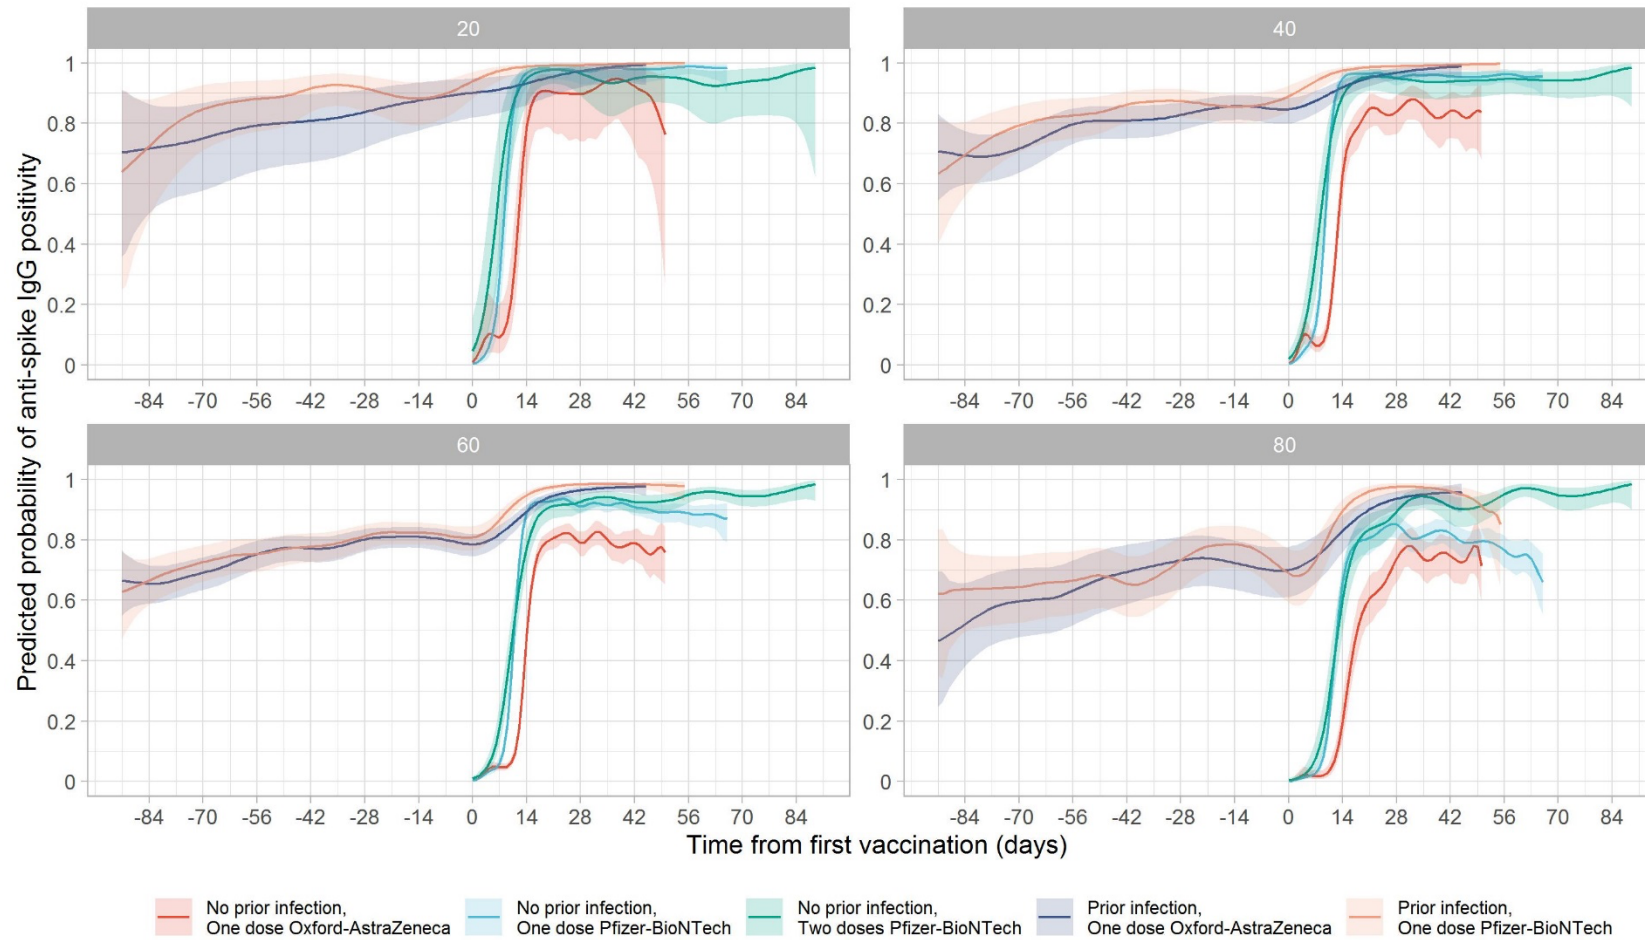

**Figure S2. Predicted probability of anti-spike IgG positivity by time from first vaccination for ages 20, 40, 60, and 80 years** (full models shown in **Figure S1**, plotted by vaccine in **Figure 1**). Line colour indicates different vaccine type and prior infection status. Data identical to **Figure 1**, but Figure 1 panels represent age rather than vaccine type as here.

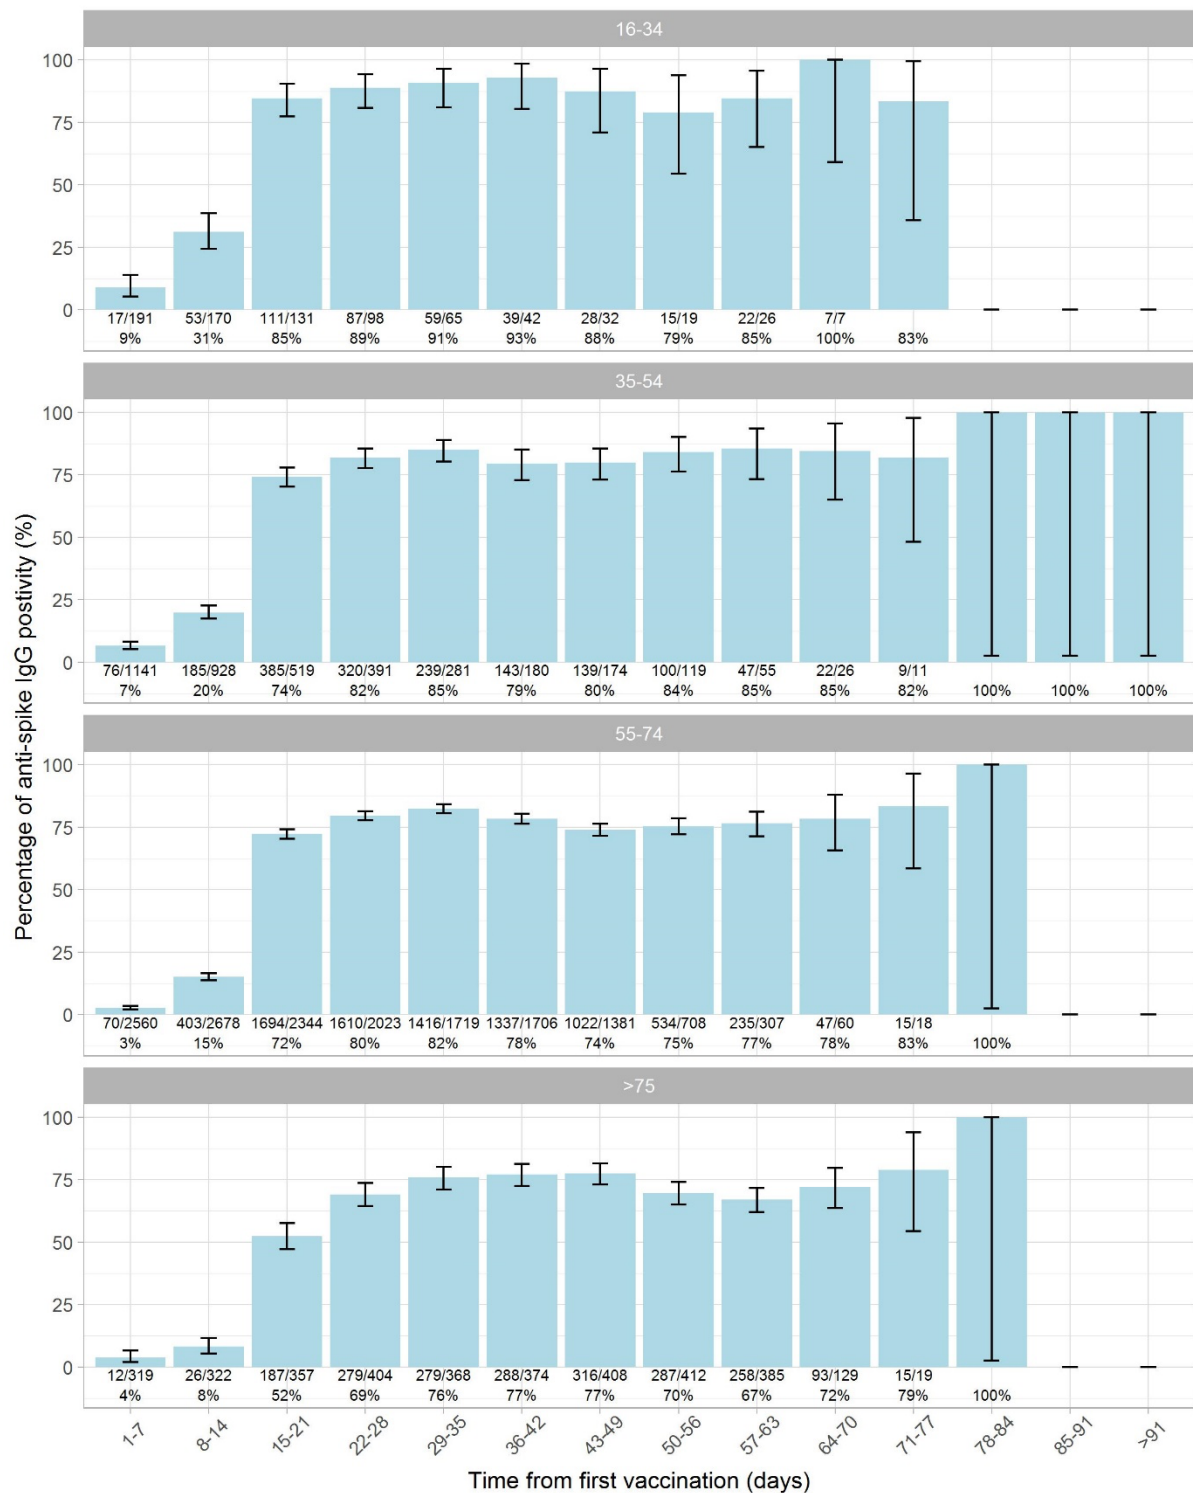

**Figure S3. Percentage (95% CI) anti-spike IgG positive by days after first vaccination in participants receiving a single dose of Oxford-AstraZeneca vaccine and without evidence of prior infection. Results were divided into four age groups: 16-34, 35-54, 55-74, and >75 years.**

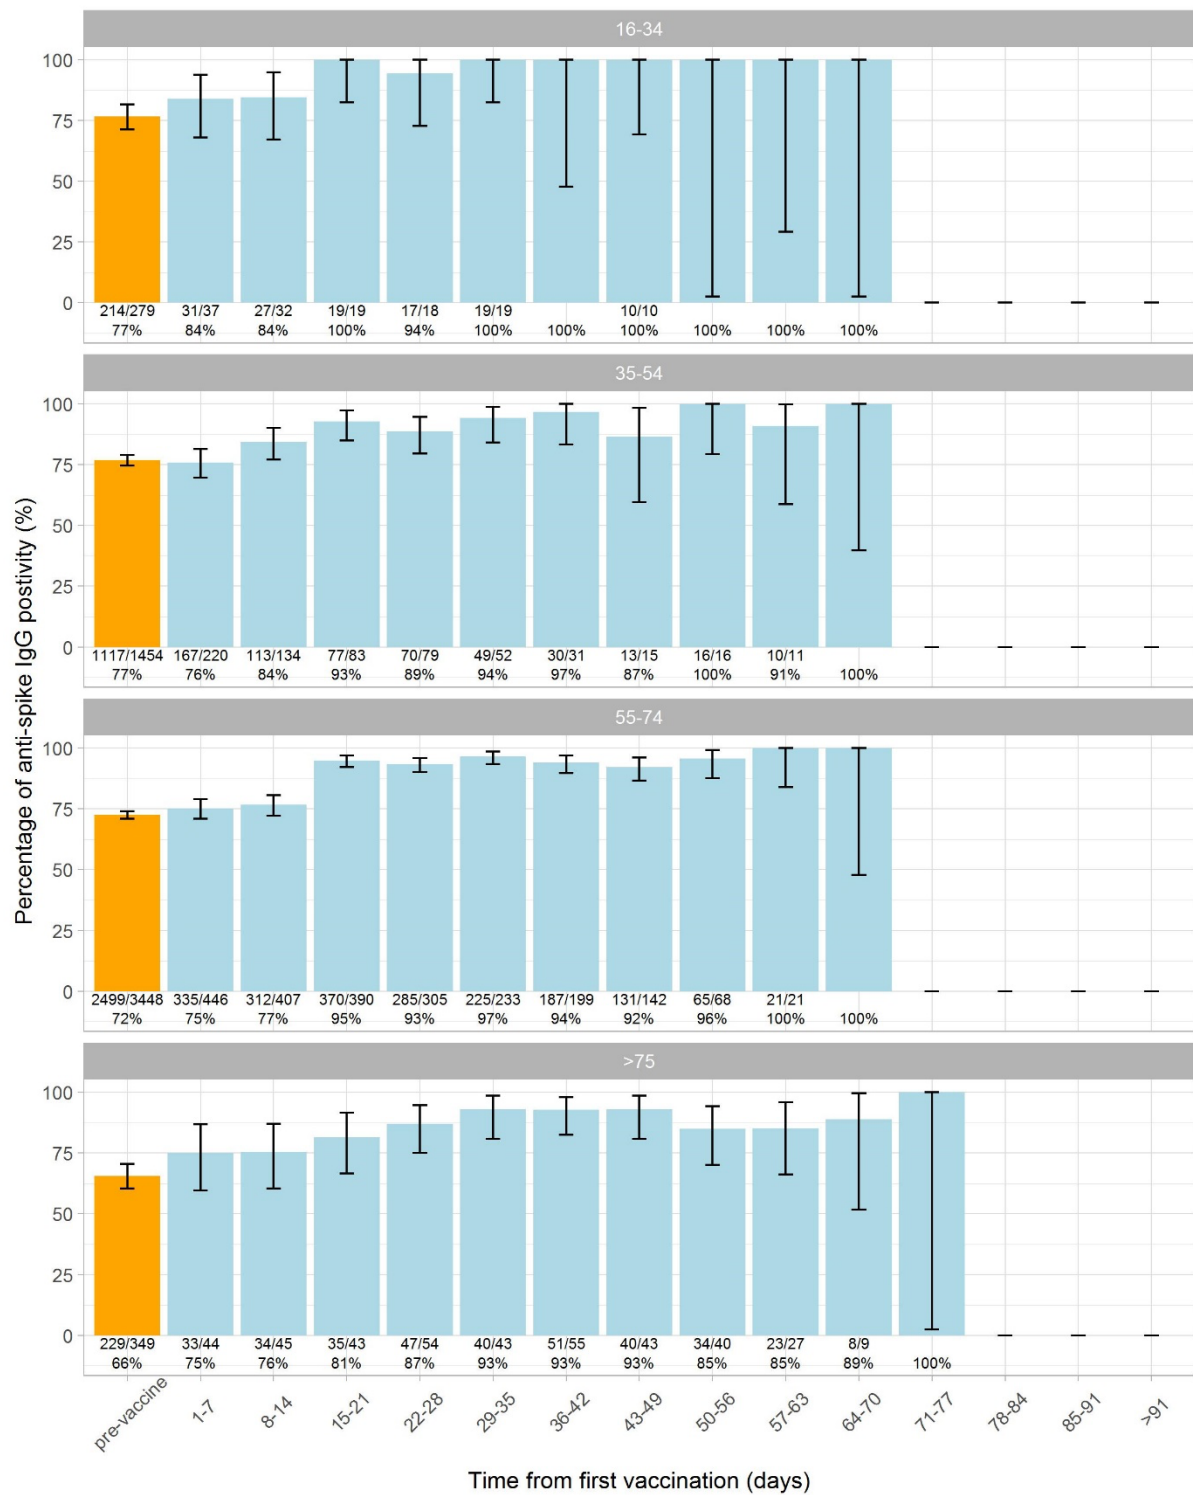

**Figure S4. Percentage (95% CI) anti-spike IgG positives by days after first vaccination in participants receiving a single dose of Oxford-AstraZeneca vaccine and with evidence of prior infection. Results were divided into four age groups: 16-34, 35-54, 55-74, and >75 years.**



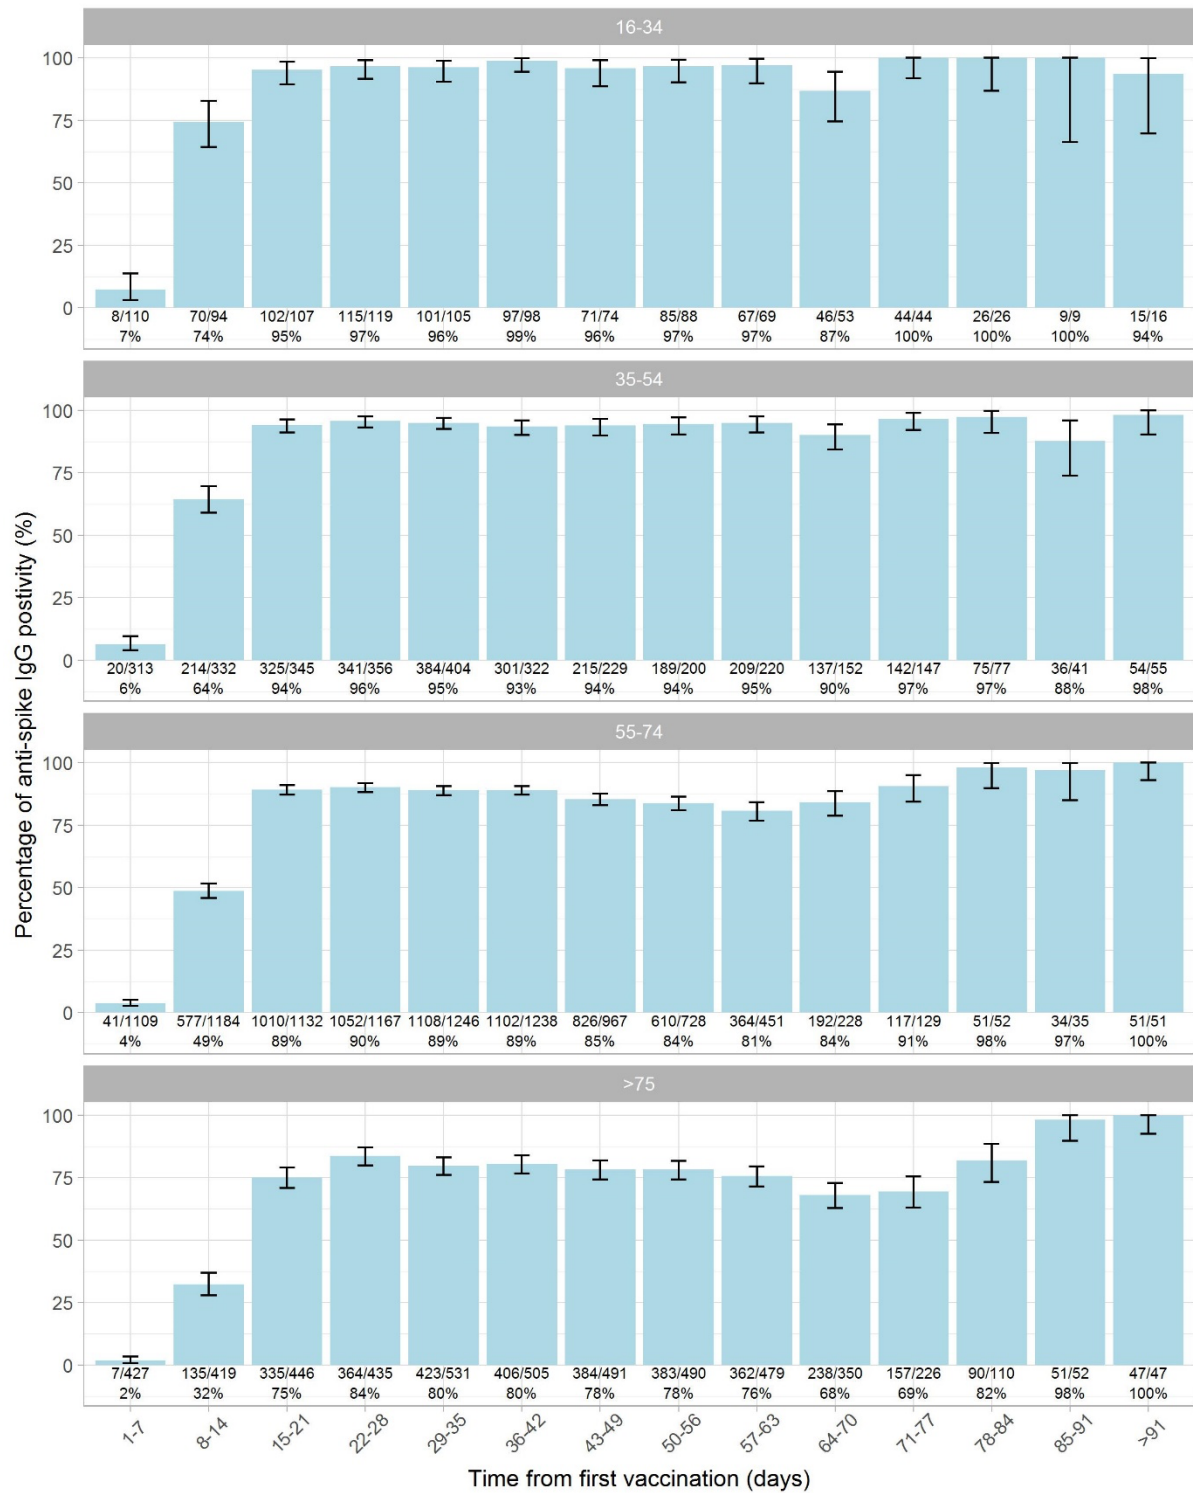

**Figure S5. Percentage (95% CI) anti-spike IgG positives by days after first vaccination in people receiving a single dose of Pfizer-BioNTech vaccine and without evidence of prior infection. Results were divided into four age groups: 16-34, 35-54, 55-74, and >75 years.**

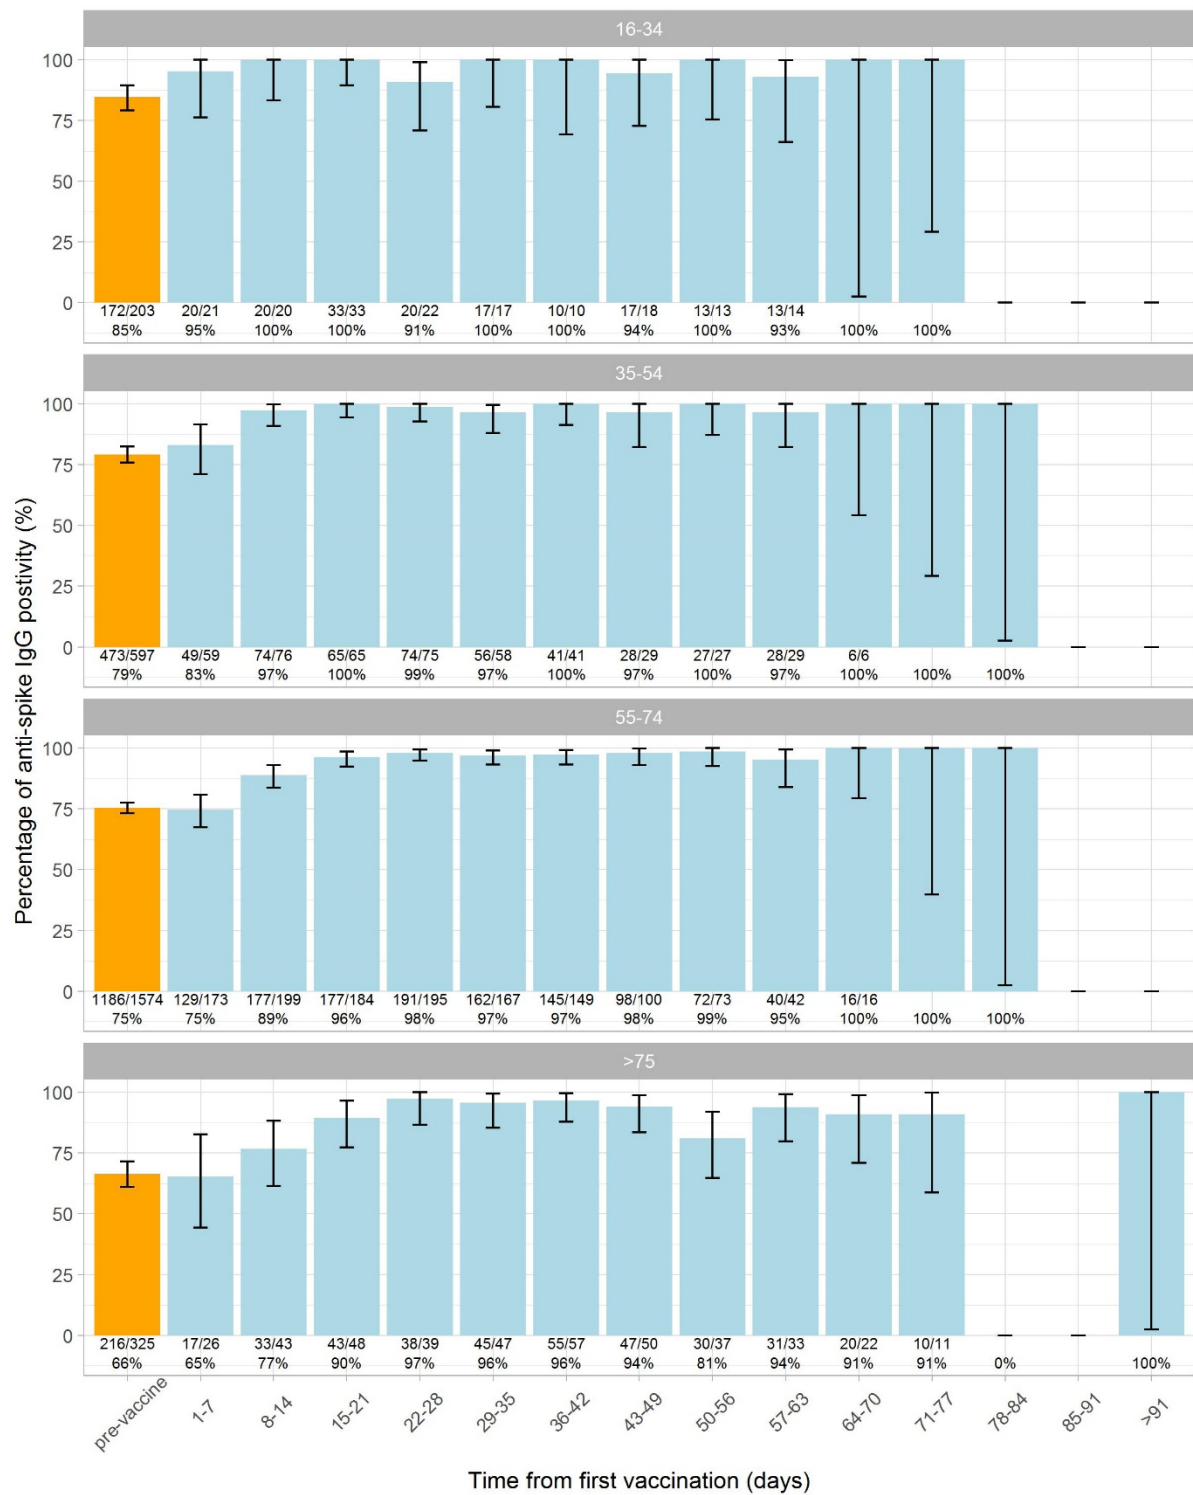

**Figure S6. Percentage (95% CI) anti-spike IgG positives by days after first vaccination in people receiving a single dose of Pfizer-BioNTech vaccine and with evidence of prior infection. Results were divided into four age groups: 16-34, 35-54, 55-74, and >75 years.**

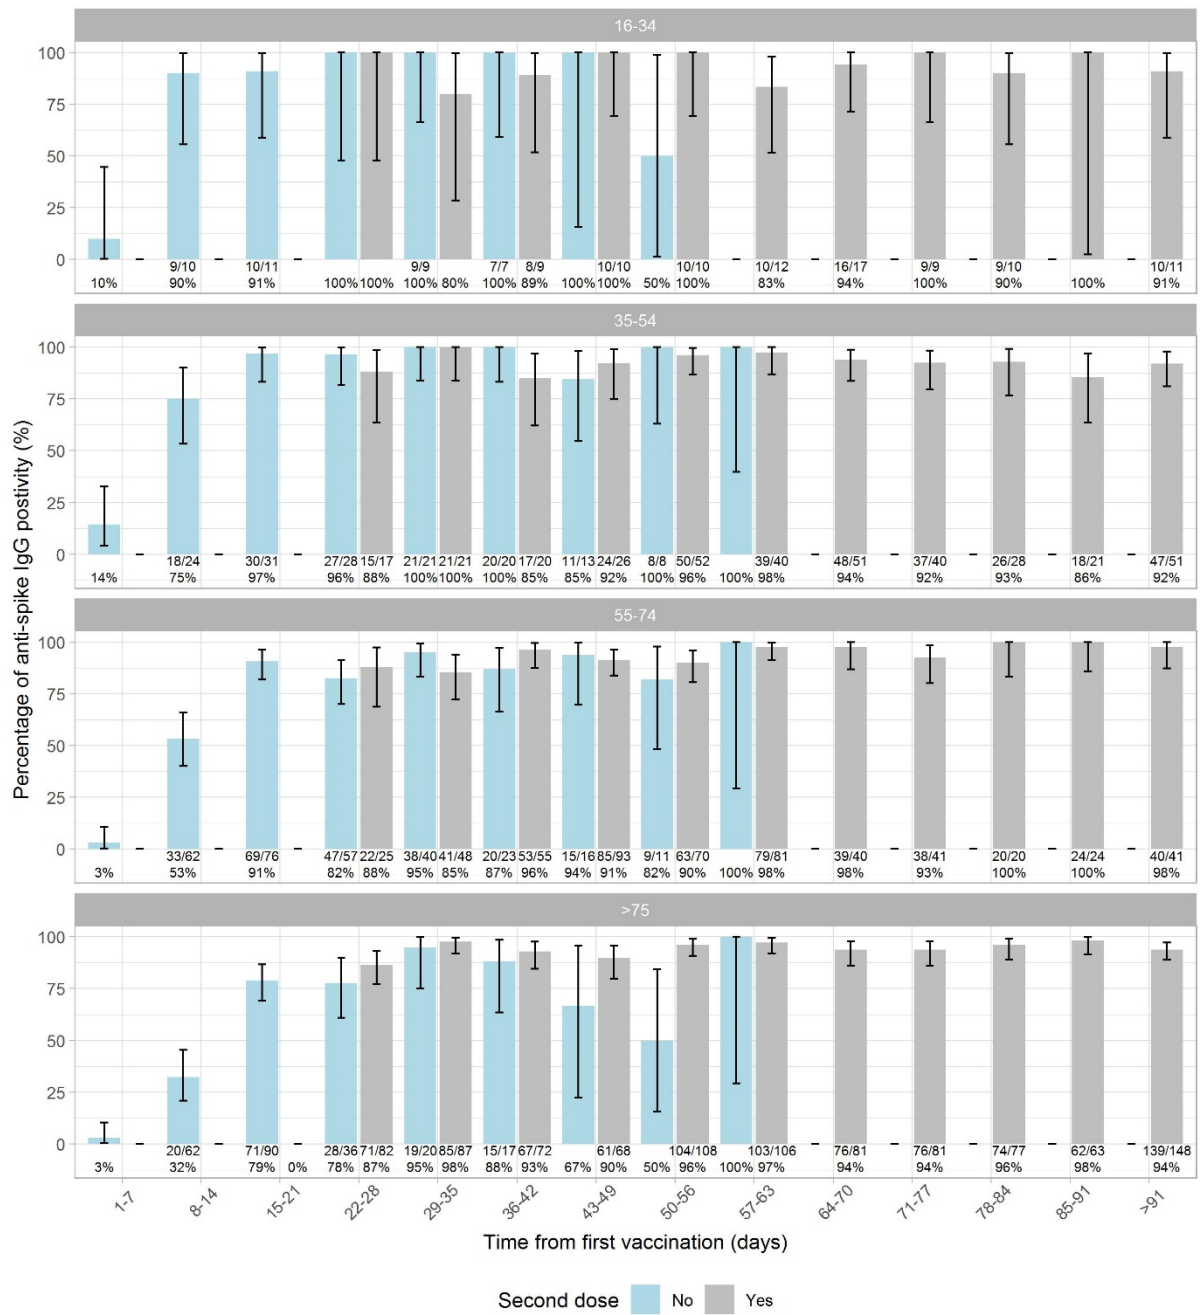

**Figure S7. Percentage (95% CI) anti-spike IgG positives by days after first vaccination in people receiving two doses of Pfizer-BioNTech vaccine and without evidence of prior infection. Results were divided into four age groups: 16-34, 35-54, 55-74, and >75 years.**

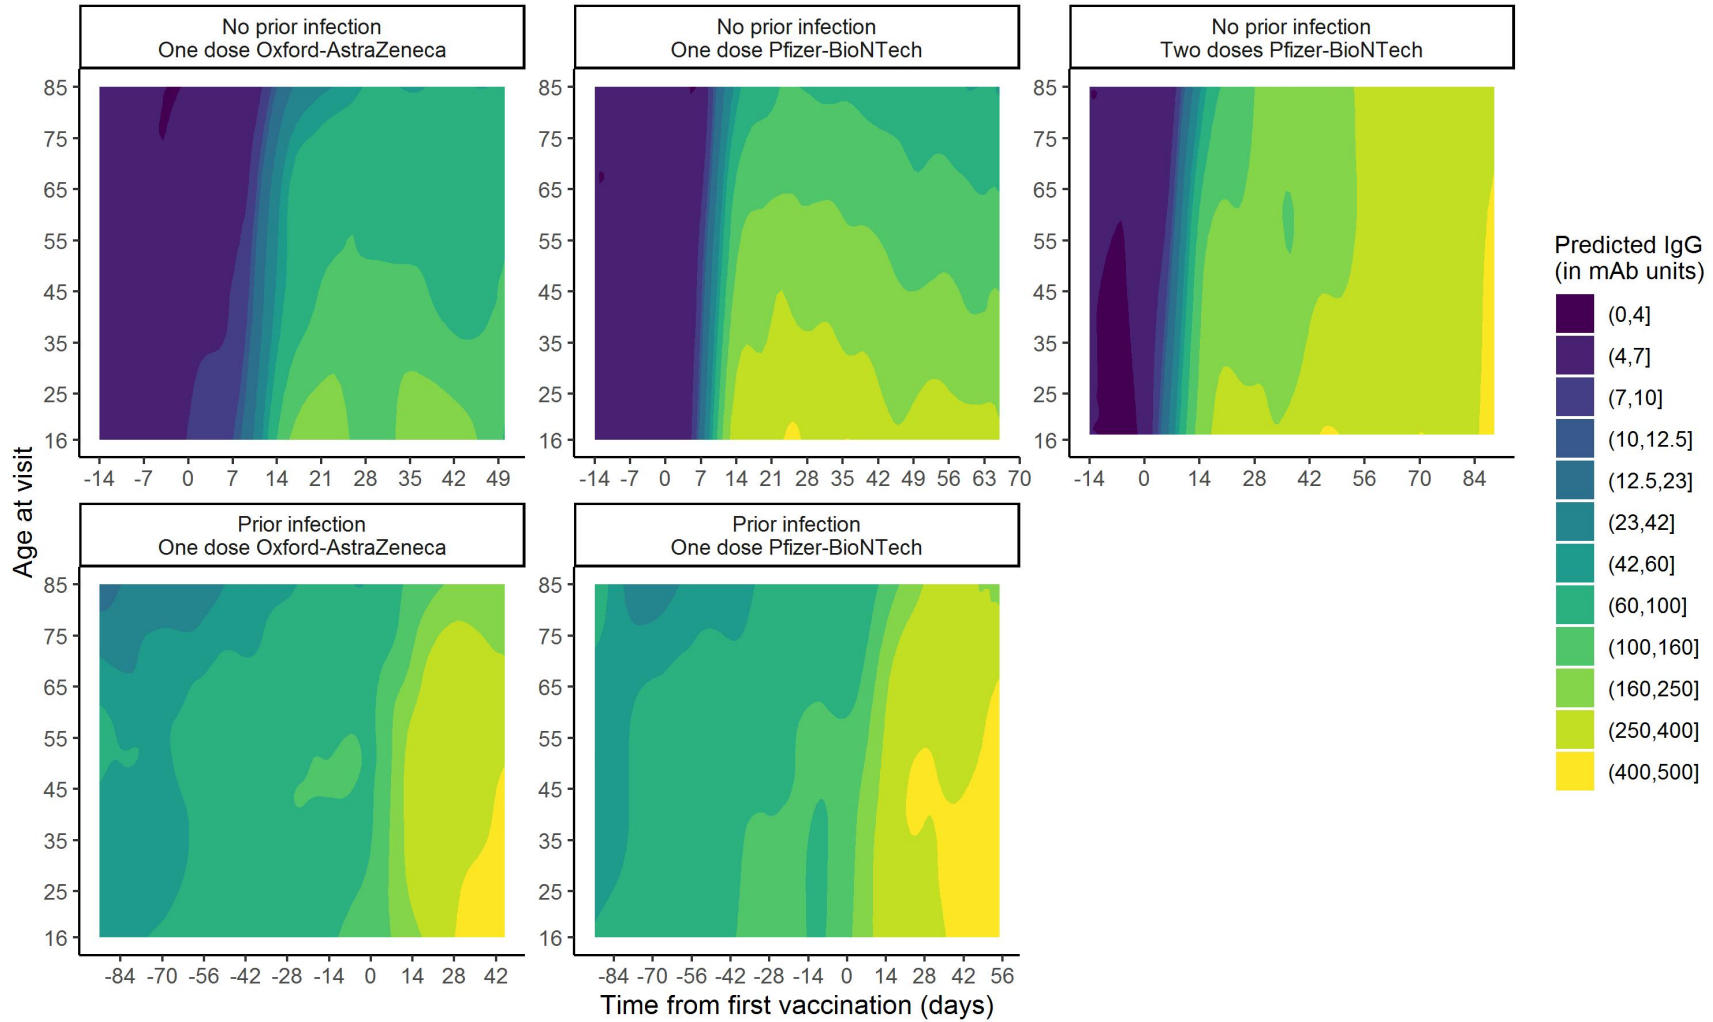

**Figure S8. Predicted anti-spike IgG levels (in mAb units) by time from first vaccination and age, according to vaccine type and prior infection status (full model).** Predictions shown for specific ages in **Figure 3**.

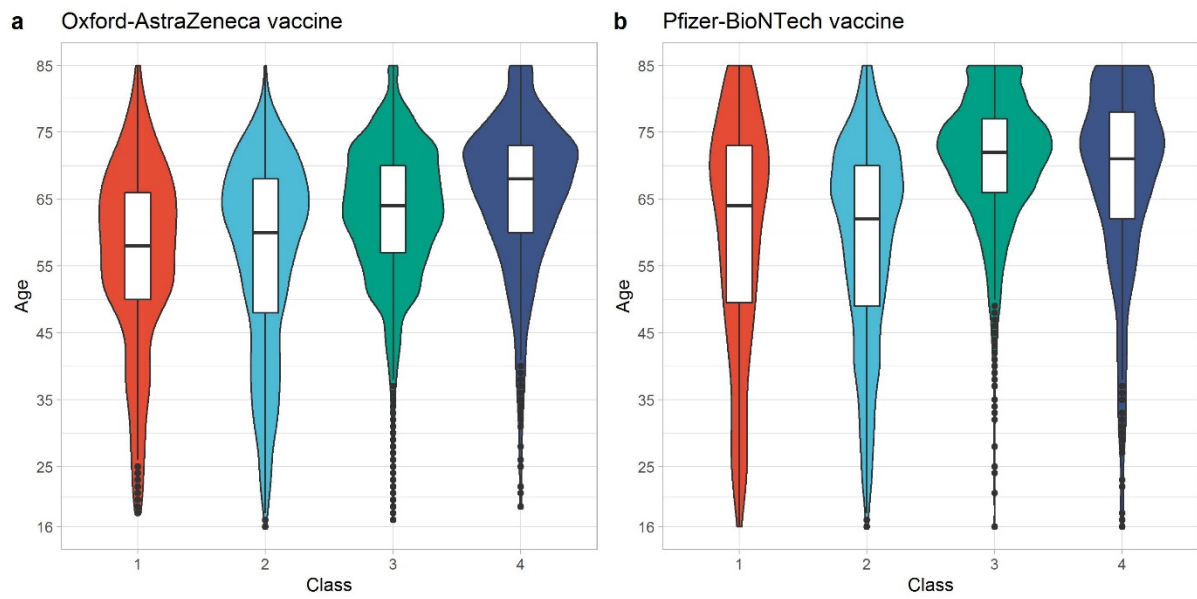

**Figure S9. Age distribution by classes identified from latent class mixed models for single dose Oxford-AstraZeneca and Pfizer-BioNTech vaccines.** 1='plausibly previously infected' group, 2='high response' group, 3='medium response' group, 4='low response group'. Same area for each violin, see Table S3 for numbers in each group.
